# Supplementary material for: Facile synthesis of N-halamine-labeled silica–polyacrylamide multilayer core–shell nanoparticles for antibacterial ability
Source: Royal Society of Chemistry journal article supplement (doi:10.1039/c5tb00973a), 2015-01-01
Supplement: c5tb00973a1.pdf [file c5tb00973a1.pdf]

## Supporting Information

*for Journal of Materials Chemistry B*

### Facile synthesis of N-halamine-labeled silica–polyacrylamide multilayer core–shell nanoparticles for antibacterial ability

Qiaohua Qiu,<sup>a</sup> Tao Liu,<sup>ab</sup> Zhihui Li,<sup>a</sup> Xinbo Ding<sup>\*a</sup>

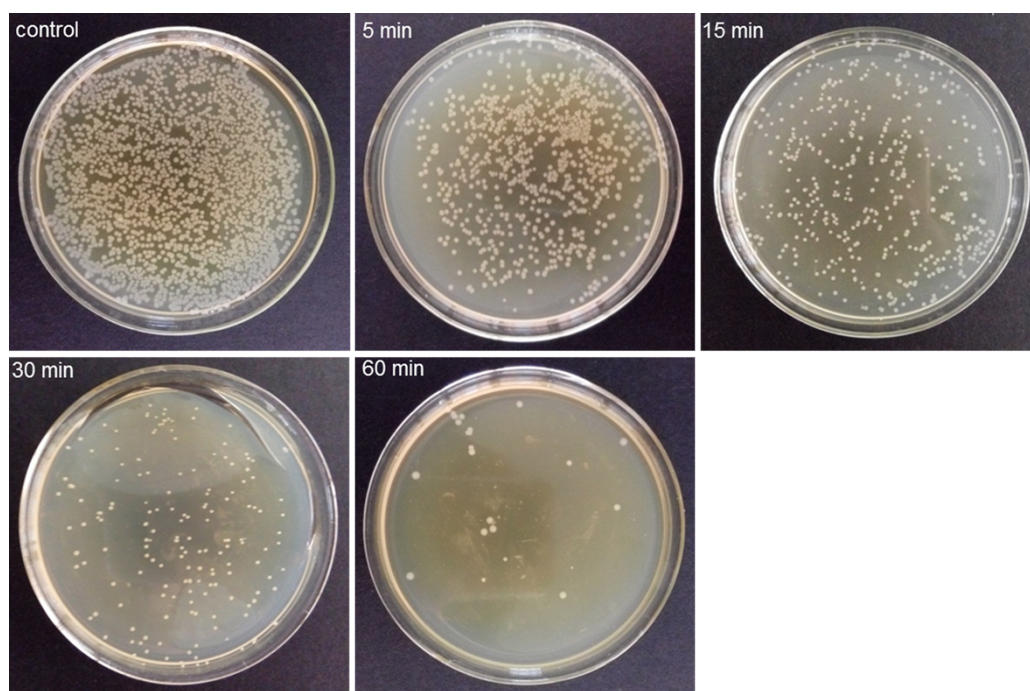

**Figure S1.** The photographs showing the bacterial culture plates of *S. aureus* upon the exposure to SiO<sub>2</sub>@PAMC nanoparticles before storage at different contact time.
